# Supplementary material
Source: Copernicus journal article supplement (doi:10.5194/hess-30-2161-2026)
Supplement: Supplementary file 1 [file hess-30-2161-2026-supplement.pdf]

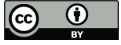

*Supplement of*

## **Hydroeconomic optimization of water management in the Yellow River Basin: dealing with scarcity**

**Yuhan Yan et al.**

*Correspondence to:* Tingju Zhu ([tingjuzhu@intl.zju.edu.cn](mailto:tingjuzhu@intl.zju.edu.cn))

The copyright of individual parts of the supplement might differ from the article licence.

**Table S1.** Key equations used in the YRB-HEM.

| Equations                                                                                                                                                                                                                                        | Variable                                                                                                           | Parameter                                   | Description                                                                                                                                                                                                                                                                                                                                                                                                                                                                                                                                                                                                                                                                                                                                                       |
|--------------------------------------------------------------------------------------------------------------------------------------------------------------------------------------------------------------------------------------------------|--------------------------------------------------------------------------------------------------------------------|---------------------------------------------|-------------------------------------------------------------------------------------------------------------------------------------------------------------------------------------------------------------------------------------------------------------------------------------------------------------------------------------------------------------------------------------------------------------------------------------------------------------------------------------------------------------------------------------------------------------------------------------------------------------------------------------------------------------------------------------------------------------------------------------------------------------------|
| <b>Objective function</b>                                                                                                                                                                                                                        |                                                                                                                    |                                             |                                                                                                                                                                                                                                                                                                                                                                                                                                                                                                                                                                                                                                                                                                                                                                   |
| $  \begin{aligned}  Max Z = & \sum_t \sum_r HP_{r,t} + \sum_y \sum_i AG_{i,y} \\  & + \sum_y \sum_c UR_{c,y} \\  & - \sum_y \sum_i Cost_{PMP}^{i,y} \\  & - \sum_t \sum_g Cost_{Pump}^{g,t} - \sum_t \sum_d Cost_{water}^{d,t}  \end{aligned}  $ | $Z$<br>$HP_{r,t}$<br>$AG_{i,y}$<br>$UR_{c,y}$<br>$Cost_{PMP}^{i,y}$<br>$Cost_{Pump}^{g,t}$<br>$Cost_{water}^{d,t}$ |                                             | <p>Objective function: total net benefit (CNY million)</p> <p>Hydropower revenue for reservoir <math>r</math> in time period <math>t</math> (CNY million/month)</p> <p>Irrigated crop production revenue on irrigation area <math>i</math> in year <math>y</math> (CNY million/year)</p> <p>Urban water use benefit in city <math>c</math> in year <math>y</math> (CNY million/year)</p> <p>Crop production cost in irrigation area <math>i</math> in year <math>y</math> estimated using PMP approach (CNY million/year)</p> <p>Pumping cost from groundwater aquifer <math>g</math> in time period <math>t</math> (CNY million/month)</p> <p>Water resource fees paid by water demand node <math>d</math> in time period <math>t</math> (CNY million/month)</p> |
| <b>Benefit</b>                                                                                                                                                                                                                                   |                                                                                                                    |                                             |                                                                                                                                                                                                                                                                                                                                                                                                                                                                                                                                                                                                                                                                                                                                                                   |
| $  \begin{aligned}  HP_{r,t} &= P_{r,t} \cdot p_{HP_r} \cdot \varphi_h \\  P_{r,t} &= K_r \cdot QT_t^r \cdot (H_t^r - T_r)  \end{aligned}  $                                                                                                     | $P_{r,t}$<br>$QT_t^r$<br>$H_t^r$                                                                                   | $\varphi_h$<br>$T_r$<br>$p_{HP_r}$<br>$K_r$ | <p>Unit conversion factor</p> <p>Solved hydropower output (MW)</p> <p>Solved monthly average flow through hydropower turbine (MCM/month)</p> <p>Solved reservoir water table (m.a.s.l.)</p> <p>Tailwater elevation (m.a.s.l.)</p> <p>Price of electricity (CNY/kWh)</p> <p>Hydropower output coefficient, the product of hydropower generation efficiency, water density and gravitational acceleration (<math>kg \cdot m^{-2} \cdot s^{-2}</math>)</p>                                                                                                                                                                                                                                                                                                           |

|                                                                                                                                                                                                                                                                                          |                                                    |                                                        |                                                                                                                                                                                                                                                                                                                                                                                                          |
|------------------------------------------------------------------------------------------------------------------------------------------------------------------------------------------------------------------------------------------------------------------------------------------|----------------------------------------------------|--------------------------------------------------------|----------------------------------------------------------------------------------------------------------------------------------------------------------------------------------------------------------------------------------------------------------------------------------------------------------------------------------------------------------------------------------------------------------|
| $AG_{i,y} = \sum_{cp} RY_{cp,y}^i \cdot Ymax_{cp}^i \cdot A_{cp,y}^i \cdot p_{AG_{cp}} \cdot \varphi_a$                                                                                                                                                                                  | $RY_{cp,y}^i$<br><br>$A_{cp,y}^i$                  | $Ymax_{cp}^i$<br><br>$p_{AG_{cp}}$<br><br>$\varphi_a$  | <p>Solved relative yield for crop <math>cp</math> at irrigation district <math>i</math> in year <math>y</math></p> <p>Maximum yield (mt/ha)</p> <p>Harvested area (ha/year)</p> <p>Crop price (CNY/mt)</p> <p>Unit conversion factor</p>                                                                                                                                                                 |
| $UR_{c,y} = \sum_c \sum_k CS_c^{k,y} + \sum_c \sum_k (p_c^{k,y} - cost_c^{k,y}) Q_c^{k,y}$ $p_c^{k,y} = \alpha_c^k - \beta_c^k \cdot Q_c^{k,y}$ $CS_c^{k,y} = \int_{p_c^{k,y}}^{p_c^{max}} (\alpha_c^k - \beta_c^k \cdot Q_c^{k,y}) dQ = \frac{1}{2} Q_c^{k,y} (\alpha_c^k - p_c^{k,y})$ | $CS_c^{k,y}$<br><br>$p_c^{k,y}$<br><br>$Q_c^{k,y}$ | $cost_c^{k,y}$<br><br>$\alpha_c^k, \beta_c^k$          | <p>Consumer surplus for city <math>c</math> and industrial or domestic water use activity <math>k</math> (CNY million/year)</p> <p>Urban water tariff (CNY·m<sup>3</sup>·year<sup>-1</sup>)</p> <p>Cost from suppliers providing water to users (CNY·m<sup>3</sup>·year<sup>-1</sup>)</p> <p>Industrial or urban domestic water use (MCM/year)</p> <p>Intercept and the slope of the demand function</p> |
| <b>Cost</b>                                                                                                                                                                                                                                                                              |                                                    |                                                        |                                                                                                                                                                                                                                                                                                                                                                                                          |
| $Cost_{pump}^{g,t} = \frac{\rho G}{\eta} \cdot H_t^g \cdot Q_t^g \cdot p_{GW} \cdot \varphi_p$                                                                                                                                                                                           | $H_t^g$<br><br>$Q_t^g$                             | $\rho$<br>$G$<br>$\eta$<br><br>$p_{GW}$<br>$\varphi_p$ | <p>Water density (kg/m<sup>3</sup>)</p> <p>Gravitational acceleration (9.81 m/s<sup>2</sup>)</p> <p>Pumping efficiency</p> <p>Solved pumping depth at groundwater aquifer <math>g</math> (m/month), constrained by minimum allowable water-table level</p> <p>Solved groundwater withdrawal (MCM/month)</p> <p>Pumping cost (CNY/kWh)</p> <p>Unit conversion factor</p>                                  |
| $Cost_{PMP}^{i,y} = \sum_{cp} (\mu_{cp}^i + 0.5\varphi_{cp}^i \cdot A_{cp,y}^i) A_{cp,y}^i$                                                                                                                                                                                              |                                                    | $\mu_{cp}^i, \varphi_{cp}^i$                           | <p>Intercept and slope for crop <math>cp</math> in irrigation district <math>i</math></p>                                                                                                                                                                                                                                                                                                                |
| $Cost_{water}^{d,t} = \sum_{nu} cost_{sur}^d \cdot Q_{sur_t}^{nu,d} + \sum_g cost_{gw}^d \cdot Q_t^{g,d}$                                                                                                                                                                                |                                                    | $cost_{sur}^d$<br>$cost_{gw}^d$                        | <p>Surface water resources fees (CNY/m<sup>3</sup>)</p> <p>Groundwater water resources fees (CNY/m<sup>3</sup>)</p>                                                                                                                                                                                                                                                                                      |

|                                                                                                                                                           |                                         |                        |                                                                                                                                                                                 |
|-----------------------------------------------------------------------------------------------------------------------------------------------------------|-----------------------------------------|------------------------|---------------------------------------------------------------------------------------------------------------------------------------------------------------------------------|
|                                                                                                                                                           | $Q_{sur_t}^{nu,d}$                      |                        | Solved total surface water used (MCM/month)                                                                                                                                     |
|                                                                                                                                                           | $Q_t^{g,d}$                             |                        | Solved total groundwater used (MCM/month)                                                                                                                                       |
| <b>Constraints</b>                                                                                                                                        |                                         |                        |                                                                                                                                                                                 |
| <b>Flow Balance</b>                                                                                                                                       |                                         |                        |                                                                                                                                                                                 |
| $S_t^n - S_{t-1}^n = \sum_n Q_t^{nu,n} - \sum_n Q_t^{n,nd}$                                                                                               | $S_t^n$<br>$Q_t^{nu,n}$<br>$Q_t^{n,nd}$ |                        | Storage of node $n$ at the end of period $t$ (MCM/month)<br>Inflow from upstream node $nu$ to node $n$ (MCM/month)<br>Outflow from node $n$ to downstream node $nd$ (MCM/month) |
| <b>Water Delivery</b>                                                                                                                                     |                                         |                        |                                                                                                                                                                                 |
| $Q_t^d = \sum_{nu} Q_{sur_t}^{nu,d} + \sum_g Q_t^{g,d}$                                                                                                   | $Q_t^d$                                 |                        | Total water delivery to node $n$ (MCM/month)                                                                                                                                    |
| <b>Irrigation</b>                                                                                                                                         |                                         |                        |                                                                                                                                                                                 |
| Water consumption<br>$Q_t^i \cdot e_i = \sum_{cp} IWD_{cp,t}^i \cdot A_{cp,y}^i \cdot \varphi_i$                                                          | $Q_t^i$<br>$IWD_{cp,t}^i$               | $e_i$                  | Irrigation water delivery (MCM/month)<br>Irrigation efficiency<br>Irrigation water demand requirement (mm/month)                                                                |
| Return flow<br>$Q_{RF_t}^{i,nd} = Q_t^i \cdot I_r^i$                                                                                                      | $Q_{RF_t}^{i,nd}$                       | $\varphi_i$<br>$I_r^i$ | Unit conversion factor<br>Irrigation return flow (MCM/month)<br>Coefficient of irrigation return flow                                                                           |
| Water demand<br>$IWD_{cp,t}^i = \begin{cases} ETc_{cp,t}^i - Pe_{cp,t}^i, & ETc_{cp,t}^i > Pe_{cp,t}^i \\ 0, & ETc_{cp,t}^i \leq Pe_{cp,t}^i \end{cases}$ | $ETc_{cp,t}^i$                          | $Pe_{cp,t}^i$          | Potential crop evapotranspiration (mm/month)<br>Effective precipitation (mm/month)                                                                                              |
| Crop evapotranspiration<br>FAO:<br>$ET_c = k_c \cdot ET_0 \cdot \varphi_c$                                                                                | $ET_0$                                  | $k_c$<br>$\varphi_c$   | Crop coefficient<br>Reference-crop evapotranspiration (mm/day)<br>Unit conversion factor                                                                                        |

|                                                                                                                   |                     |                                                  |                                                                                                                                                                                                                                                                                                                        |
|-------------------------------------------------------------------------------------------------------------------|---------------------|--------------------------------------------------|------------------------------------------------------------------------------------------------------------------------------------------------------------------------------------------------------------------------------------------------------------------------------------------------------------------------|
| Priestly-Taylor:<br>$ET_0 = \alpha \frac{\Delta}{\Delta + \gamma} (R_n - G)$                                      |                     | $\alpha$<br>$\Delta$<br>$\gamma$<br>$R_n$<br>$G$ | Priestly-Taylor coefficient (default is 0.23 for surface covered with short reference crop)<br>Gradient of saturated vapor pressure (kPa/°C)<br>Psychrometric constant (kPa/°C)<br>Net shortwave solar radiation (MJ·m <sup>-2</sup> ·day <sup>-1</sup> )<br>Ground heat flux (MJ·m <sup>-2</sup> ·day <sup>-1</sup> ) |
| Actual evapotranspiration<br>$\theta \cdot ETc_{cp,t}^i \leq ETa_{cp,t}^i \leq ETc_{cp,t}^i$                      | $ETa_{cp,t}^i$      | $\theta$                                         | Actual crop evapotranspiration (mm/month)<br>Minimum evapotranspiration factor                                                                                                                                                                                                                                         |
| Relative yield<br>$RY_{cp,y}^i = \prod_{m=1}^M \left( \frac{ETa_{cp,t}^i}{ETc_{cp,t}^i} \right)^{\lambda_{cp}^m}$ |                     | $\lambda_{cp}^m$                                 | Sensitivity factor at growing stage $m$ of crop $cp$ . The growing stage $m$ represents the order of months within the growing period of crop $cp$ in irrigation area $i$ , which is harvested in year $y$ .                                                                                                           |
| <b>Reservoir</b>                                                                                                  |                     |                                                  |                                                                                                                                                                                                                                                                                                                        |
| Evaporation<br>$ER_t^r = Emax_t^r \cdot A_t^r \cdot \varphi_r$                                                    | $ER_t^r$<br>$A_t^r$ | $Emax_t^r$<br>$\varphi_r$                        | Solved reservoir evaporation (MCM/month)<br>Open water evapotranspiration rate at reservoir $r$ (mm/month)<br>Solved reservoir surface area (km <sup>2</sup> /month)<br>Unit conversion factor                                                                                                                         |
| Release<br>$\sum_r Q_t^{r,nd} = QT_t^r + QS_t^r$                                                                  | $QS_t^r$            |                                                  | Reservoir spill (MCM/month)                                                                                                                                                                                                                                                                                            |
| Elevation vs. storage<br>$H_t^r = h_1^r + h_2^r \cdot \left( \frac{S_t^r + S_{t-1}^r}{2} \right) h_3^r$           |                     | $h_1^r, h_2^r, h_3^r$                            | Reservoir water table curve coefficients (elevation vs. storage)                                                                                                                                                                                                                                                       |
| Area vs. storage<br>$A_t^r = a_1^r + a_2^r \cdot \left( \frac{S_t^r + S_{t-1}^r}{2} \right) a_3^r$                |                     | $a_1^r, a_2^r, a_3^r$                            | Reservoir area curve coefficients (area vs. storage)                                                                                                                                                                                                                                                                   |

|                                                                                                                                                                             |         |                                                                                                      |                                                                                                                                                                                                                                                                                                                                                                                             |
|-----------------------------------------------------------------------------------------------------------------------------------------------------------------------------|---------|------------------------------------------------------------------------------------------------------|---------------------------------------------------------------------------------------------------------------------------------------------------------------------------------------------------------------------------------------------------------------------------------------------------------------------------------------------------------------------------------------------|
| <p>Range control</p> $S_{dead}^r \leq S_t^r \leq S_{max}^{r,t}$ $P_{min}^r \leq P_{r,t} \leq P_{max}^r$ $Q_t^{r,nd} \geq Q_{control,t}^{r,nd}$ $H_t^r \geq H_{control,t}^r$ |         | $S_{dead}^r, S_{max}^{r,t}$<br>$P_{min}^r, P_{max}^r$<br>$Q_{control,t}^{r,nd}$<br>$H_{control,t}^r$ | <p>Dead storage (MCM) and allowable storage upper limit (MCM) for reservoir <math>r</math></p> <p>Firm power and installed hydropower capacity at powerplant <math>r</math> (MW)</p> <p>Minimum reservoir release for ice flood control and sediment flushing requirements (MCM/month)</p> <p>Minimum reservoir water table for ice flood and sediment flushing requirements (m.a.s.l.)</p> |
| <b>City</b>                                                                                                                                                                 |         |                                                                                                      |                                                                                                                                                                                                                                                                                                                                                                                             |
| <p>Water use control</p> $D_{min}^{k,y} \leq Q_c^{k,y} \leq D_{max}^{k,y}$                                                                                                  |         | $D_{max}^{k,y}, D_{min}^{k,y}$                                                                       | <p>Maximum and minimum industrial or municipal water demand (MCM/month)</p>                                                                                                                                                                                                                                                                                                                 |
| <b>Ecosystem</b>                                                                                                                                                            |         |                                                                                                      |                                                                                                                                                                                                                                                                                                                                                                                             |
| <p>Replenishment control</p> $Q_{min}^{e,t} \leq Q_t^e \leq Q_{max}^{e,t}$                                                                                                  | $Q_t^e$ | $Q_{min}^{e,t}$<br>$Q_{max}^{e,t}$                                                                   | <p>Delivered ecosystem flow to wetland area <math>e</math> (MCM/month)</p> <p>Ecosystem flow lower limit (MCM/month)</p> <p>Ecosystem flow upper limit (MCM/month)</p>                                                                                                                                                                                                                      |

Notes:

1. Node types: q-surface inflow; g-groundwater; r-reservoir; i-irrigation area; c-city; e-ecosystem; j-junction; s-sink; d-demand nodes; n-storage, conveyance and junction.
2. Year index value  $y$  can be determined using the time period value  $t$  (month sequence,  $t = 1, \dots, 240$  in this study):  $y = \text{int}(\text{ord}(t - 1) / 12) + 1$ , where “int” is the floor function that rounds down a fractional number to its nearest integer, and “ord” means ordinal number.
3. Units: MCM-million cubic meters; m.a.s.l.-meters above sea level.

Table S2-1 to S2-6 provide details of each type of nodes, and related location information.

Table S2-1. Irrigation nodes, names, and provinces.

| <b>IRND</b> | <b>Irrigated Area</b> | <b>Province</b> |
|-------------|-----------------------|-----------------|
| <i>I1</i>   | D02_QH_HuangShui      | Qinghai         |
| <i>I2</i>   | D03_NX_WeiNing        | Ningxia         |
| <i>I3</i>   | D03_NX_Qingtongxia    |                 |
| <i>I4</i>   | D03_NM_Hetao          |                 |
| <i>I5</i>   | D03_NM_Nanan          | Inner Mongolia  |
| <i>I6</i>   | D03_NM_TMC            |                 |
| <i>I7</i>   | D05_SX_Fenhe          |                 |
| <i>I8</i>   | D05_SN_Weihe          | Shaanxi         |
| <i>I9</i>   | D06_HN_Xiaolangdi     | Henan           |
| <i>I10</i>  | D06_HN_Yinqin         |                 |
| <i>I11</i>  | D07_HN_Henan          |                 |
| <i>I12</i>  | D07_SD_Shandong       | Shandong        |
| <i>I13</i>  | D02_GS                | Gansu           |
| <i>I14</i>  | D03_GS                |                 |
| <i>I15</i>  | D04_NM                | Inner Mongolia  |
| <i>I16</i>  | D04_SN                | Shaanxi         |
| <i>I17</i>  | D04_SX                | Shanxi          |
| <i>I18</i>  | D05_GS                | Gansu           |
| <i>I19</i>  | D05_HN                | Henan           |
| <i>I20</i>  | D05_NX                | Ningxia         |
| <i>I21</i>  | D06_HN                | Henan           |
| <i>I22</i>  | D06_SX                | Shanxi          |

Table S2-2. Secondary water resources regionalization of the YRB. Regionalization was delineated by official authorities, considering both natural characteristics and administrative boundaries. Endorheic basin areas are excluded from this study.

| <b>Code</b> | <b>Region</b>          |
|-------------|------------------------|
| <i>D01</i>  | Above Longyangxia      |
| <i>D02</i>  | Longyangxia to Lanzhou |
| <i>D03</i>  | Lanzhou to Hekouzhen   |
| <i>D04</i>  | Hekouzhen to Longmen   |
| <i>D05</i>  | Longmen to Sanmenxia   |
| <i>D06</i>  | Sanmenxia to HuaCNYkou |
| <i>D07</i>  | Below HuaCNYkou        |

**Table S2-3.** City nodes, names, and provinces.

| <b>CND</b>  | <b>City</b> | <b>Province</b> |
|-------------|-------------|-----------------|
| <i>XN</i>   | Xining      | Qinghai         |
| <i>LZ</i>   | Lanzhou     | Gansu           |
| <i>BY</i>   | Baiyin      |                 |
| <i>YC</i>   | Yinchuan    | Ningxia         |
| <i>ZW</i>   | Zhongwei    |                 |
| <i>WZ</i>   | Wuzhong     |                 |
| <i>SZS</i>  | Shizuishan  |                 |
| <i>HHHT</i> | Hohhot      | Inner Mongolia  |
| <i>BYNE</i> | Bayan Nur   |                 |
| <i>BT</i>   | Baotou      |                 |
| <i>EEDS</i> | Ordos       |                 |
| <i>TY</i>   | TaiCNY      | Shanxi          |
| <i>JINZ</i> | Jinzhong    |                 |
| <i>DT</i>   | Datong      |                 |
| <i>SZ</i>   | Shuozhou    |                 |
| <i>LL</i>   | Lvliang     |                 |
| <i>YUNC</i> | Yuncheng    |                 |
| <i>LF</i>   | Linfen      |                 |
| <i>XA</i>   | Xi'an       | Shaanxi         |
| <i>XY</i>   | Xianyang    |                 |
| <i>YL</i>   | Yulin       |                 |
| <i>YA</i>   | Yan'an      |                 |
| <i>WNA</i>  | Weinan      |                 |
| <i>ZZ</i>   | Zhengzhou   | Henan           |
| <i>LY</i>   | Luoyang     |                 |
| <i>JZ</i>   | Jiaozuo     |                 |
| <i>XX</i>   | Xinxiang    |                 |
| <i>KF</i>   | Kaifeng     |                 |
| <i>PY</i>   | Puyang      |                 |
| <i>JN</i>   | Jinan       | Shandong        |
| <i>LC</i>   | Liaocheng   |                 |
| <i>TA</i>   | Taian       |                 |
| <i>BZ</i>   | Binzhou     |                 |
| <i>DY</i>   | Dongying    |                 |

**Table S2-4.** Ecosystem nodes, sites, and provinces.

| <b>END</b>  | <b>Site</b>        | <b>Province</b> |
|-------------|--------------------|-----------------|
| <i>XHH</i>  | Xinghai Lake       | Ningxia         |
| <i>WLSH</i> | Wuliangsu Lake     | Inner Mongolia  |
| <i>DaiH</i> | Daihai Lake        |                 |
| <i>BYD</i>  | Baiyangdian Lake   | Hebei           |
| <i>YRD</i>  | Yellow River Delta | Shandong        |

**Table S2-5.** Inflow nodes, names of tributaries, and locations.

| <b>QND</b> | <b>Tributary</b> | <b>Location</b> | <b>Notes</b>                               |
|------------|------------------|-----------------|--------------------------------------------|
| <i>TP</i>  | Tibetan Plateau  |                 | Mainstream inflow to Longyangxia Reservoir |
| <i>TH</i>  | Taohe            | Upper reaches   | Tributary                                  |
| <i>DTH</i> | Datonghe         |                 |                                            |
| <i>HS</i>  | Huangshui        |                 |                                            |
| <i>DHH</i> | Daheihe          |                 |                                            |
| <i>KYH</i> | Kuyehe           |                 |                                            |
| <i>WDH</i> | Wudinghe         |                 |                                            |
| <i>FH</i>  | Fenhe            | Middle reaches  |                                            |
| <i>JH</i>  | Jinghe           |                 |                                            |
| <i>WH</i>  | Weihe            |                 |                                            |
| <i>YLH</i> | Yiluohe          | Lower reaches   |                                            |
| <i>QH</i>  | Qinhe            |                 |                                            |
| <i>DWH</i> | Dawenhe          |                 |                                            |

**Table S2-6.** Reservoir nodes, names and provinces.

| <b>RND</b>   | <b>Reservoir</b> | <b>Province</b> |
|--------------|------------------|-----------------|
| <i>LYX</i>   | Longyangxia      | Qinghai         |
| <i>LiJX</i>  | Lijiaxia         |                 |
| <i>LiuJX</i> | Liujiaxia        | Gansu           |
| <i>YGX</i>   | Yanguoxia        |                 |
| <i>BPX</i>   | Bapanxia         |                 |
| <i>DX</i>    | Daxia            |                 |
| <i>QTX</i>   | Qingtongxia      | Ningxia         |
| <i>WJZ</i>   | Wanjiashai       | Shanxi          |
| <i>SMX</i>   | Sanmenxia        | Henan           |
| <i>XLD</i>   | Xiaolangdi       |                 |

**Table S3.** Crop calendar with sensitivity factor for all irrigated crops in the YRB.

| Crop          | Months |      |      |      |      |      |      |      |      |      |      |      |
|---------------|--------|------|------|------|------|------|------|------|------|------|------|------|
|               | 1      | 2    | 3    | 4    | 5    | 6    | 7    | 8    | 9    | 10   | 11   | 12   |
| Spring wheat  |        |      | 0.04 | 0.13 | 0.57 | 0.35 | 0.37 |      |      |      |      |      |
| Winter wheat  | 0.12   | 0.10 | 0.18 | 0.32 | 0.24 |      |      |      |      | 0.14 | 0.11 | 0.12 |
| Rice          | 0.29   |      |      |      | 0.36 | 1.05 | 0.95 | 0.60 | 0.58 | 0.60 | 0.58 | 0.60 |
| Spring maize  |        |      |      | 0.11 | 0.75 | 1.40 | 0.26 | 0.22 | 0.09 |      |      |      |
| Summer maize  |        |      |      |      | 0.02 | 0.92 | 1.39 | 0.33 | 0.16 | 0.01 |      |      |
| Sorghum       |        |      |      |      | 0.08 | 0.35 | 0.35 | 0.25 | 0.11 |      |      |      |
| Other cereals |        |      |      | 0.11 | 0.58 | 0.21 | 0.21 | 0.31 |      |      |      |      |
| Potato        |        |      |      |      | 0.52 | 0.67 | 0.43 | 0.23 | 0.04 |      |      |      |
| Bean          |        |      |      |      | 0.56 | 0.93 | 0.51 | 0.14 |      |      |      |      |
| Lentil        |        |      |      | 0.53 | 0.89 | 0.34 | 0.26 | 0.11 |      |      |      |      |
| Other pulses  |        |      | 0.13 | 0.90 | 0.61 | 0.14 |      |      |      |      |      |      |
| Soybean       |        |      |      |      | 0.12 | 0.85 | 0.29 | 0.52 | 0.25 | 0.01 |      |      |
| Groundnut     |        |      |      |      | 0.13 | 0.54 | 0.54 | 0.28 | 0.08 |      |      |      |
| Sunflower     |        |      |      |      | 0.27 | 0.36 | 0.68 | 0.84 | 0.21 |      |      |      |
| Rapeseed      | 0.71   | 0.54 |      |      |      |      |      |      |      | 0.27 | 0.27 | 0.56 |
| Cotton        |        |      |      |      | 0.16 | 0.25 | 0.25 | 0.24 | 0.17 | 0.11 |      |      |
| Vegetable     | 0.12   | 0.11 | 0.56 |      |      |      |      |      |      | 0.20 | 0.25 | 0.14 |
| Tomato        | 0.45   |      |      |      |      |      |      |      | 0.13 | 0.21 | 0.24 | 0.34 |
| Melon         |        |      |      | 0.28 | 0.79 | 0.64 | 0.46 | 0.35 | 0.02 |      |      |      |
| Rest          |        |      |      | 0.74 | 0.76 | 0.56 | 0.15 |      |      |      |      |      |

**Table S4.** Model performance for major hydrological gauge stations, reservoirs' end-of-year storage values, and agricultural water use against observed data, assessed with Percent Bias (PBIAS) and Normalized Root Mean Square Error (NRMSE).

| Category               | Name                        | PBIAS (%) | NRMSE (%) | Period    |
|------------------------|-----------------------------|-----------|-----------|-----------|
| Hydrological station   | Lanzhou                     | -5.48     | 15.99     | 1996-2015 |
|                        | Xiaheyan                    | -9.61     | 18.50     |           |
|                        | Tongguan                    | 10.22     | 21.34     |           |
|                        | HuaCNYkou                   | -0.99     | 18.69     |           |
| Reservoir storage      | Longyangxia Reservoir       | 3.80      | 25.79     | 1997-2015 |
|                        | Xiaolangdi Reservoir        | 0.40      | 25.96     | 2005-2015 |
| Agricultural water use | Total irrigation withdrawal | 7.66      | 10.58     | 1996-2015 |

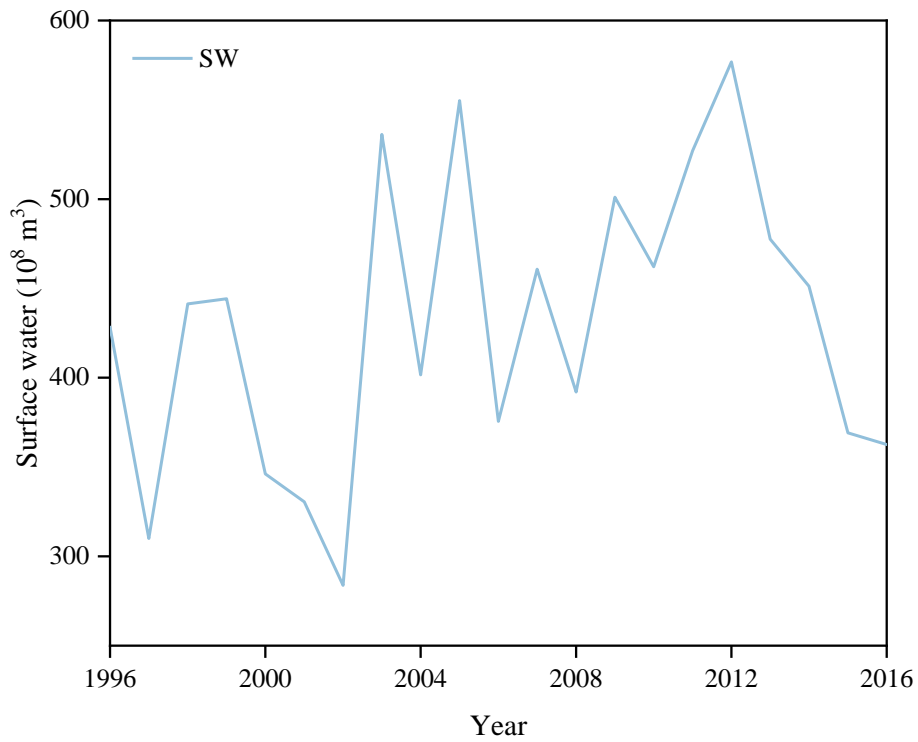

**Fig. S1.** Total surface water (SW) inflow during 1996 to 2016 in the YRB.

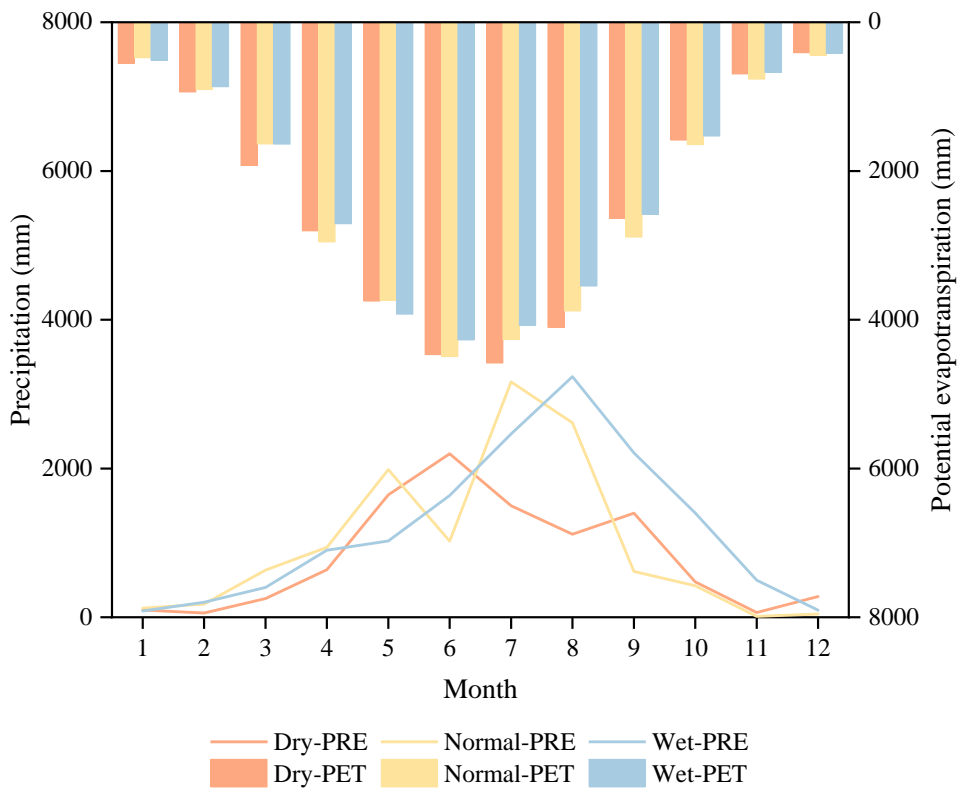

**Fig. S2.** Monthly precipitation (PRE) and reference evapotranspiration (PET) by hydrological year type, averaged over the entire YRB.

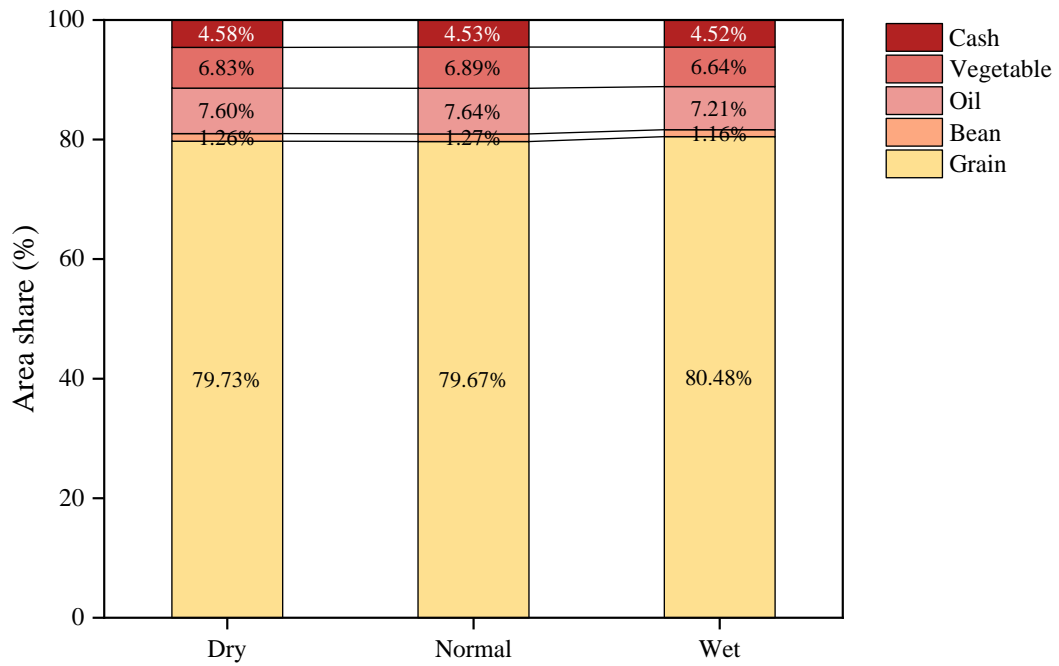

**Fig. S3.** Cropping patterns in the YRB by hydrological year type.

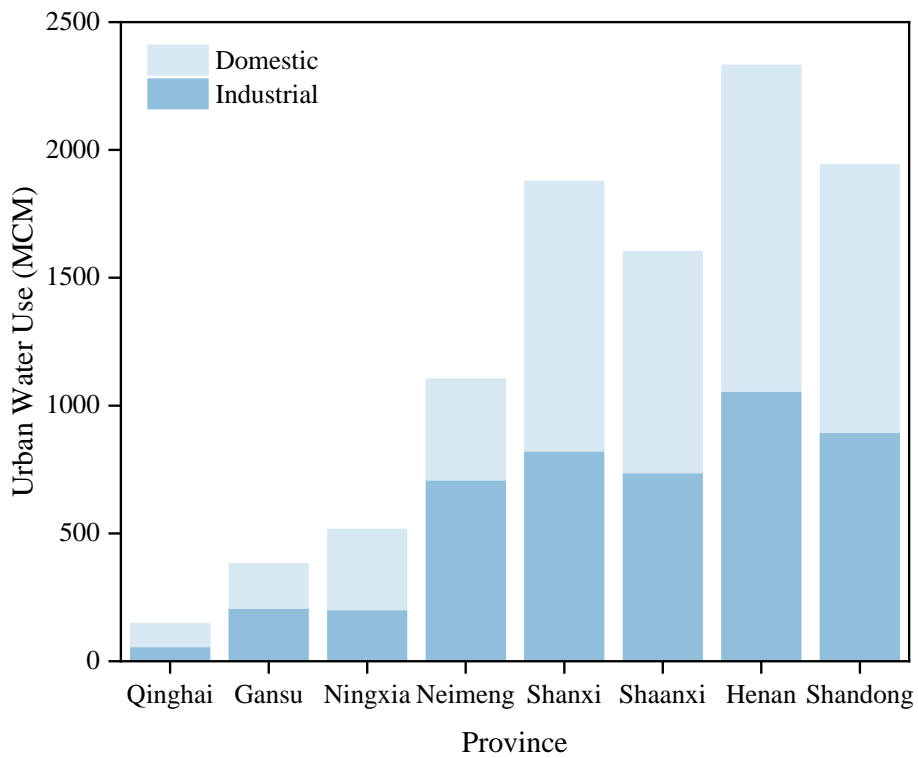

**Fig. S4.** Annual urban water uses by sector and province in the YRB.

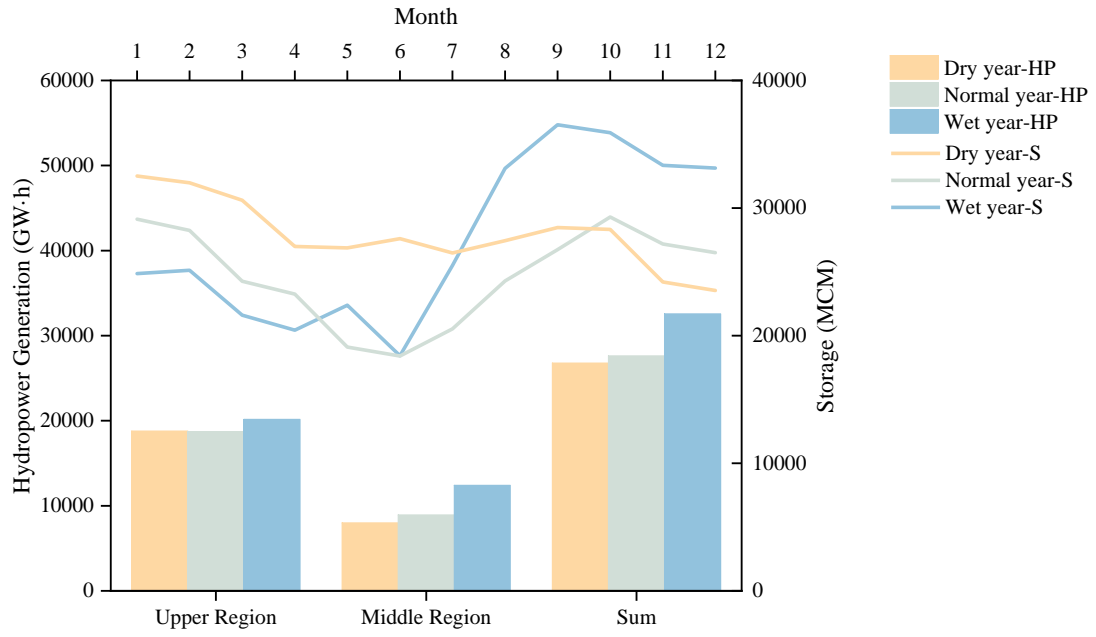

**Fig. S5.** Annual hydropower generation (HP) and monthly water storage (S) in the YRB, by hydrological year type.
